# Supplementary material for: Hybrid 3D Printed and Electrospun Multi-Scale Hierarchical Polycaprolactone Scaffolds to Induce Bone Differentiation
Source: MDPI journal article supplement (doi:10.3390/pharmaceutics14122843), 2022-12-19
Supplement: s1 [file s1]

**Table S1.** Bio-Rad PrimePCR primers for real time RT-qPCR.

| Gene symbol  | Gene Name                                | PrimePCR ID    |
|--------------|------------------------------------------|----------------|
| <i>Alpl</i>  | Alkaline phosphatase                     | qMmuCID0006482 |
| <i>Spp1</i>  | Secreted phosphoprotein 1, Opn           | qMmuCED0040763 |
| <i>Gapdh</i> | Glyceraldehyde-3-phosphate dehydrogenase | qMmuCED0027497 |

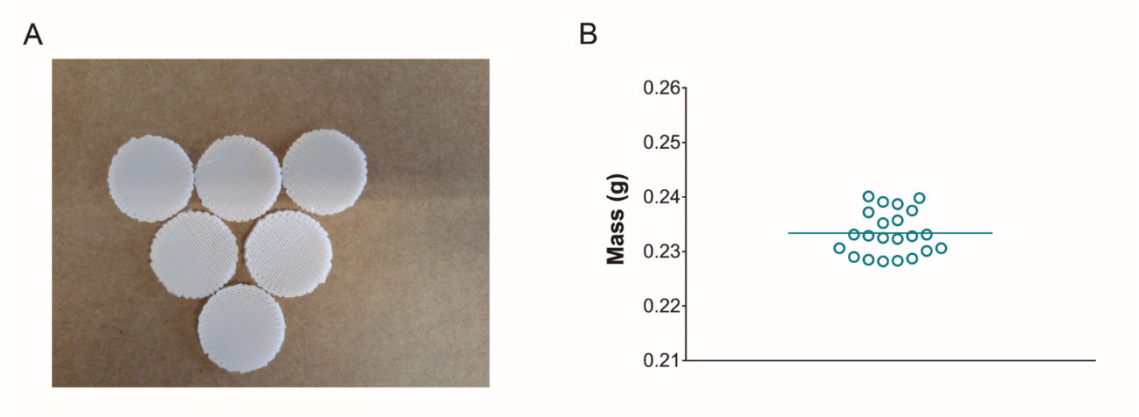

**Figure S1.** Homogeneity of Hybrid PCL scaffolds. (A) Macroscopic image of Hybrid PCL scaffolds. (B) Mass distribution of Hybrid PCL scaffolds.

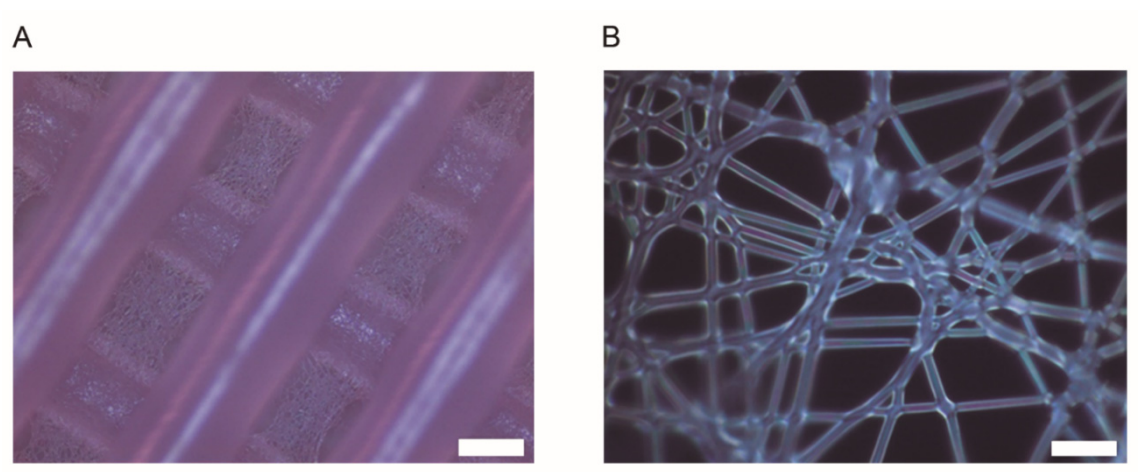

**Figure S2.** Optical microscope images of PCL hybrid scaffolds. Scale bars: (A) 200  $\mu\text{m}$  and (B) 10  $\mu\text{m}$ .

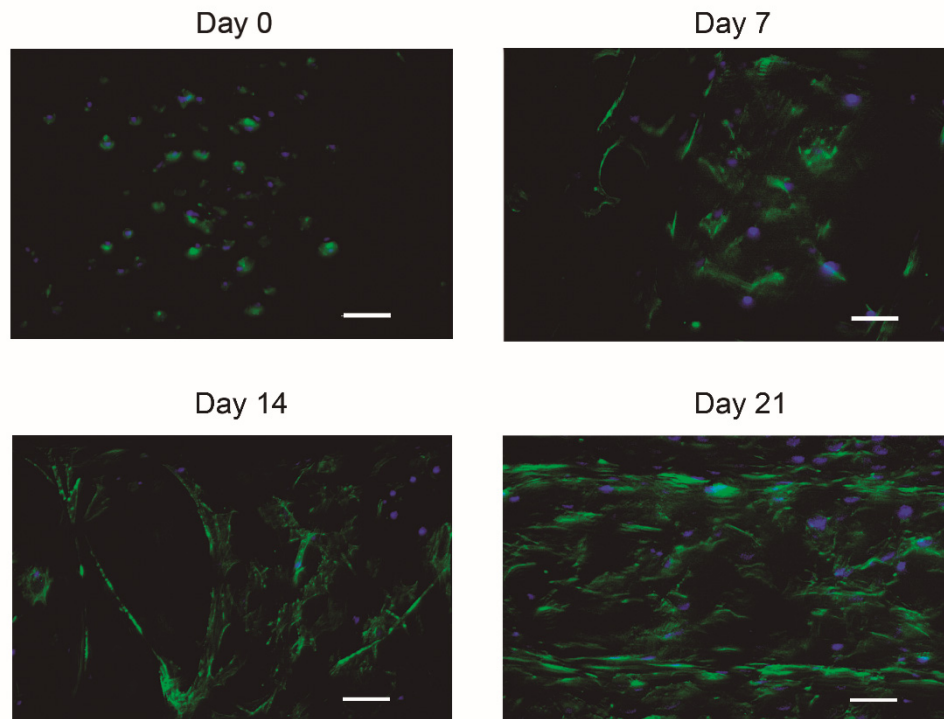

**Figure S3.** Cell culture on hybrid PCL scaffolds. MC-3T3 murine osteoblast culture on hybrid PCL scaffolds: fluorescent DAPI/Phalloidin micrographs for cell distribution and morphology. Scale bars = 60  $\mu\text{m}$ .
